# Supplementary material for: Simulation of groundwater flow and seawater intrusion in response to climate change and human activities on the coastal aquifer of Gaza Strip, Palestine
Source: Springer Nature journal article supplement (doi:10.1007/s10040-023-02694-7), 2023-08-30
Supplement: MOESM1 [file 25978644]

**Simulation of groundwater flow and seawater intrusion in response to climate change and human activities on the coastal aquifer of Gaza Strip, Palestine**

**Iyad Musallam <sup>1</sup>, Yangxiao Zhou <sup>2</sup>, and Graham Jewitt <sup>2</sup>**

<sup>1</sup> Department of Water Resources Development, Water Resources Unit, Water and Environment Quality Authority (WEQA), Gaza, P840–P899, Gaza Strip, Palestine; Email [iyadmus@gmail.com](mailto:iyadmus@gmail.com)

<sup>2</sup> IHE, Delft Institute for Water Education, The Netherlands

**Section S1** Rainfall stations and monthly rainfall from period 2010 to 2019

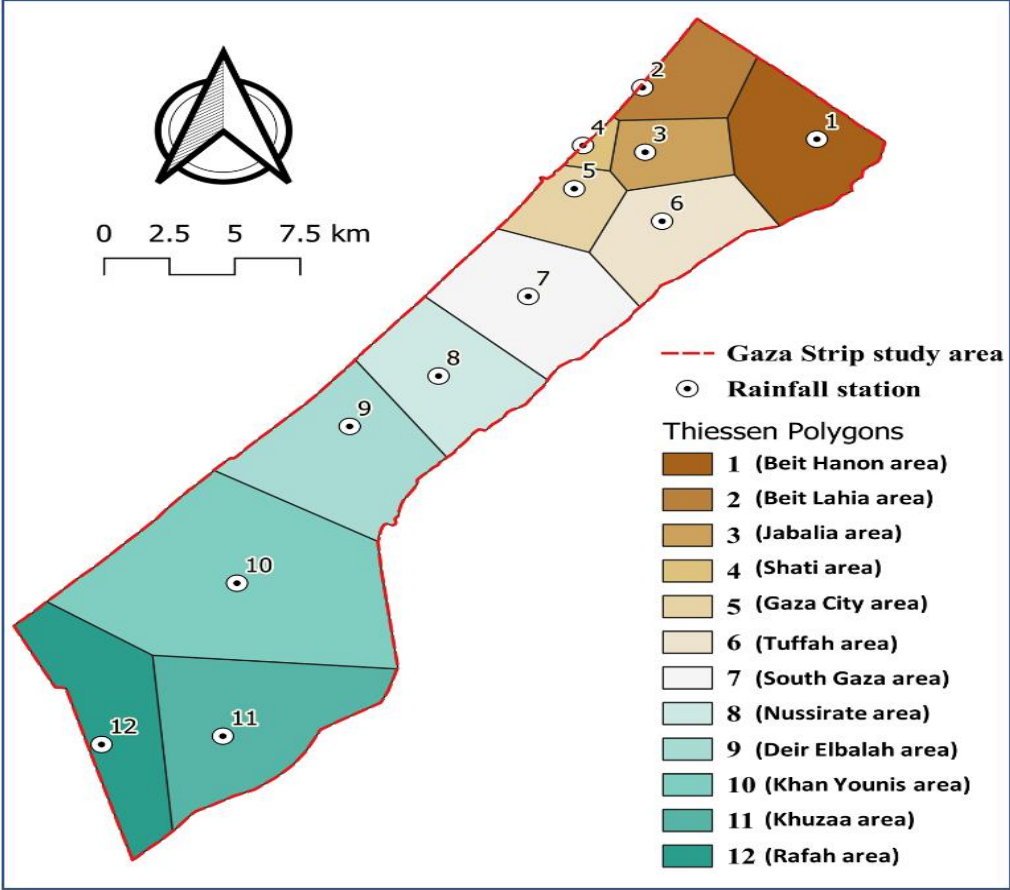

**Fig S1** Locations of rainfall gauge stations and Thiessen polygons created with QGIS

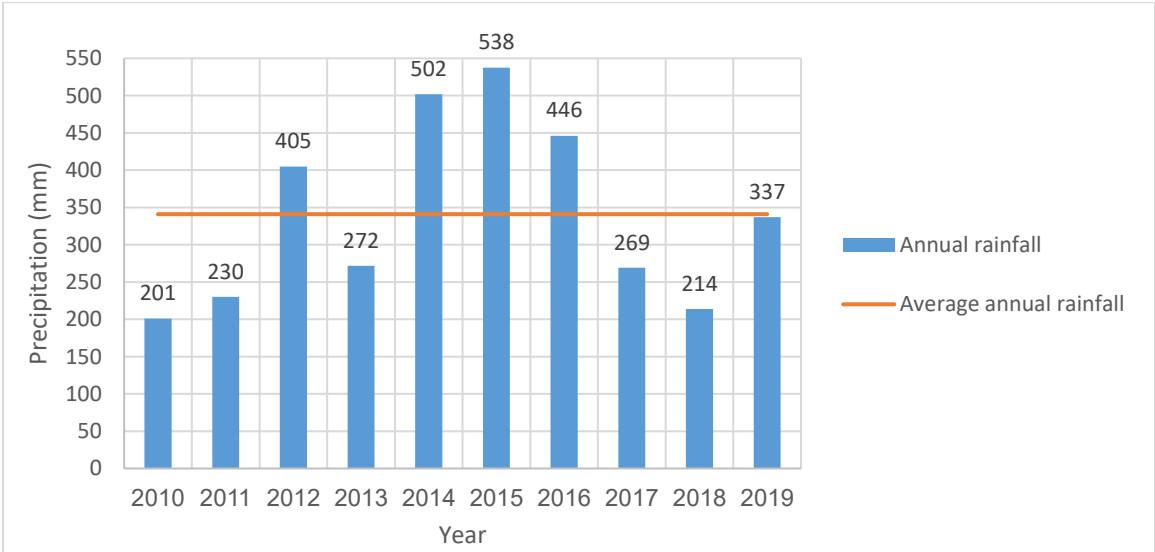

**Fig S2** Annual rainfall and average rainfall from period 2010 to 2019

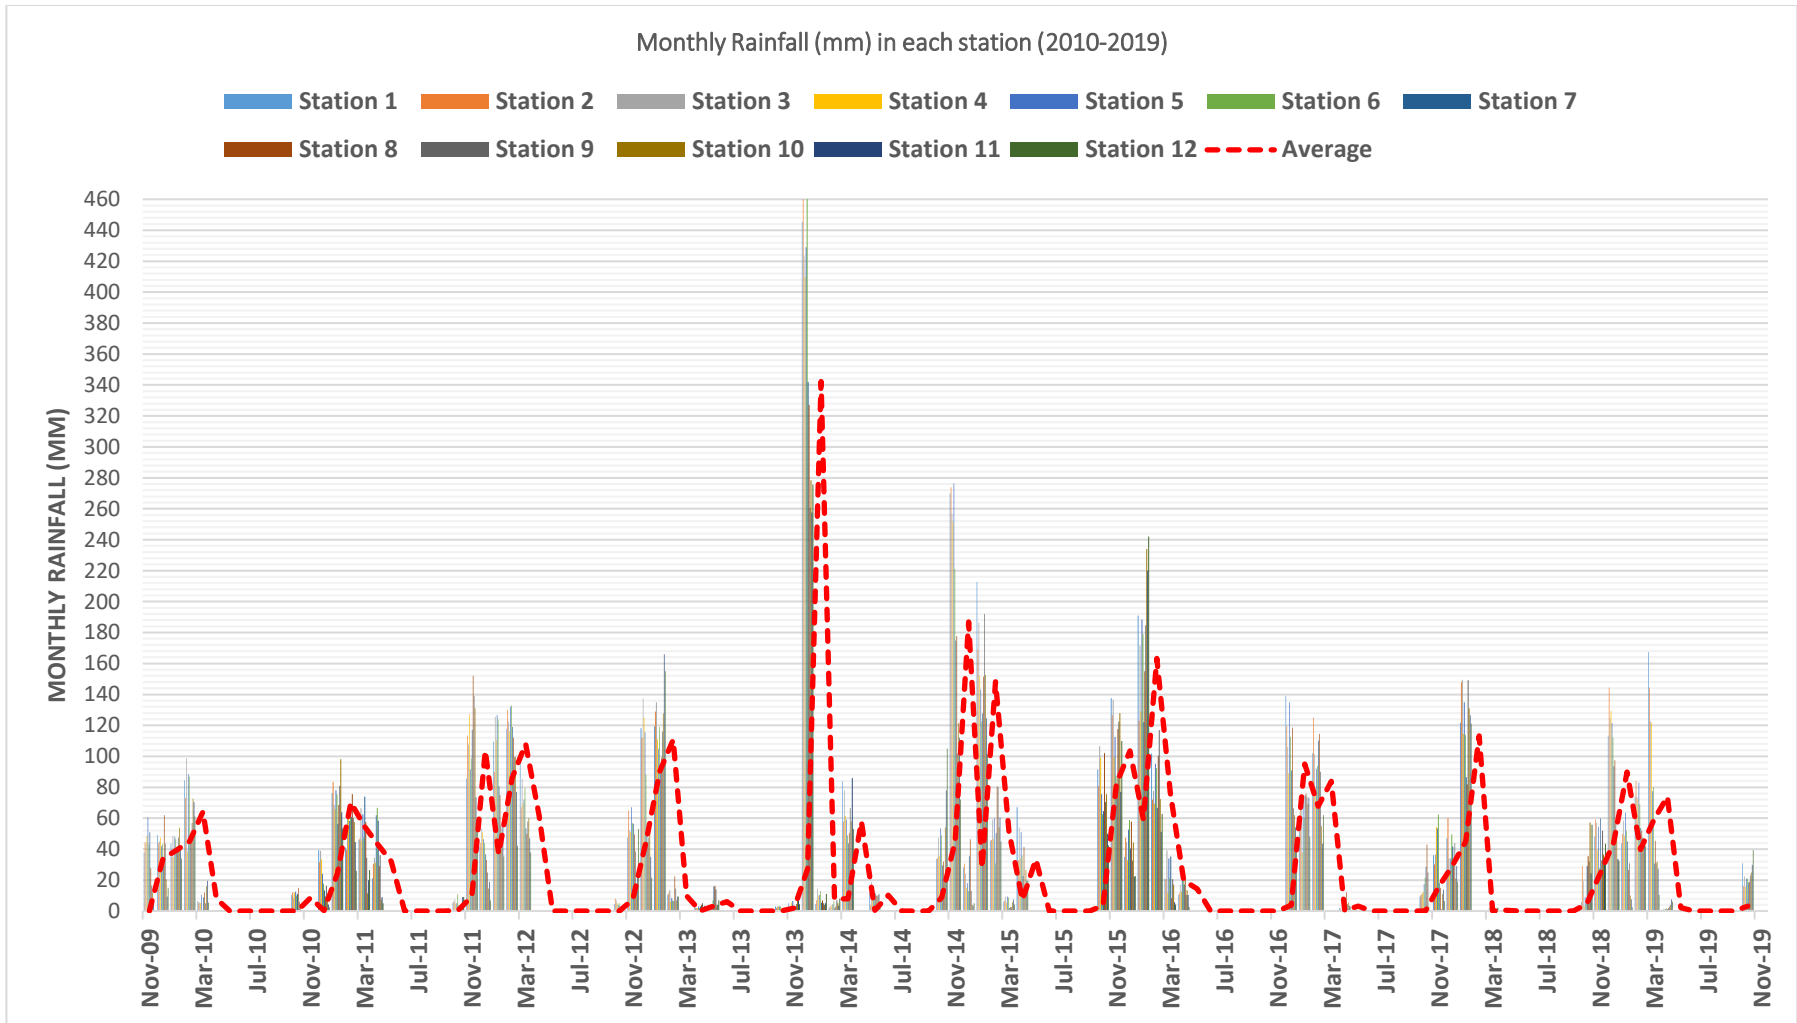

**Fig S3** Monthly rainfall at each station from period 2010 to 2019 (PWA 2020)

## Section S2 Calibrated parameter values for all model layers

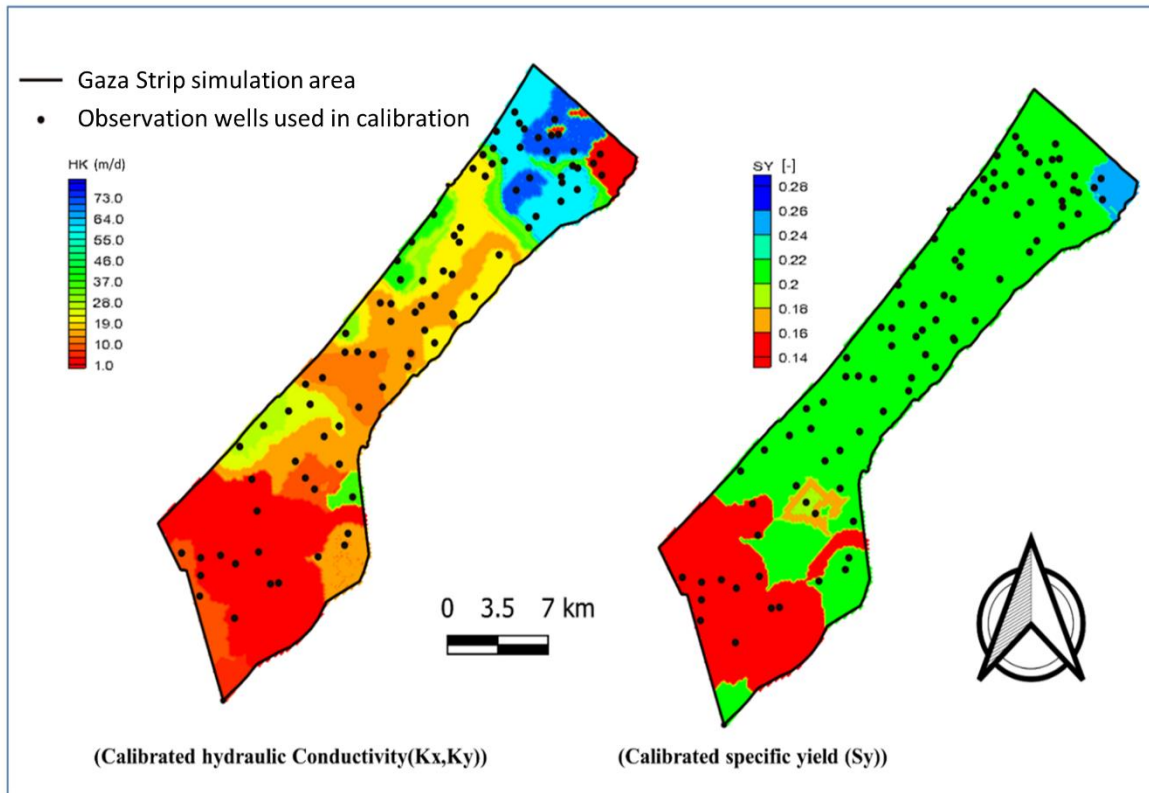

**Fig S4** Sub-Aquifer A (layer 1) Calibrated horizontal hydraulic conductivity and specific yield

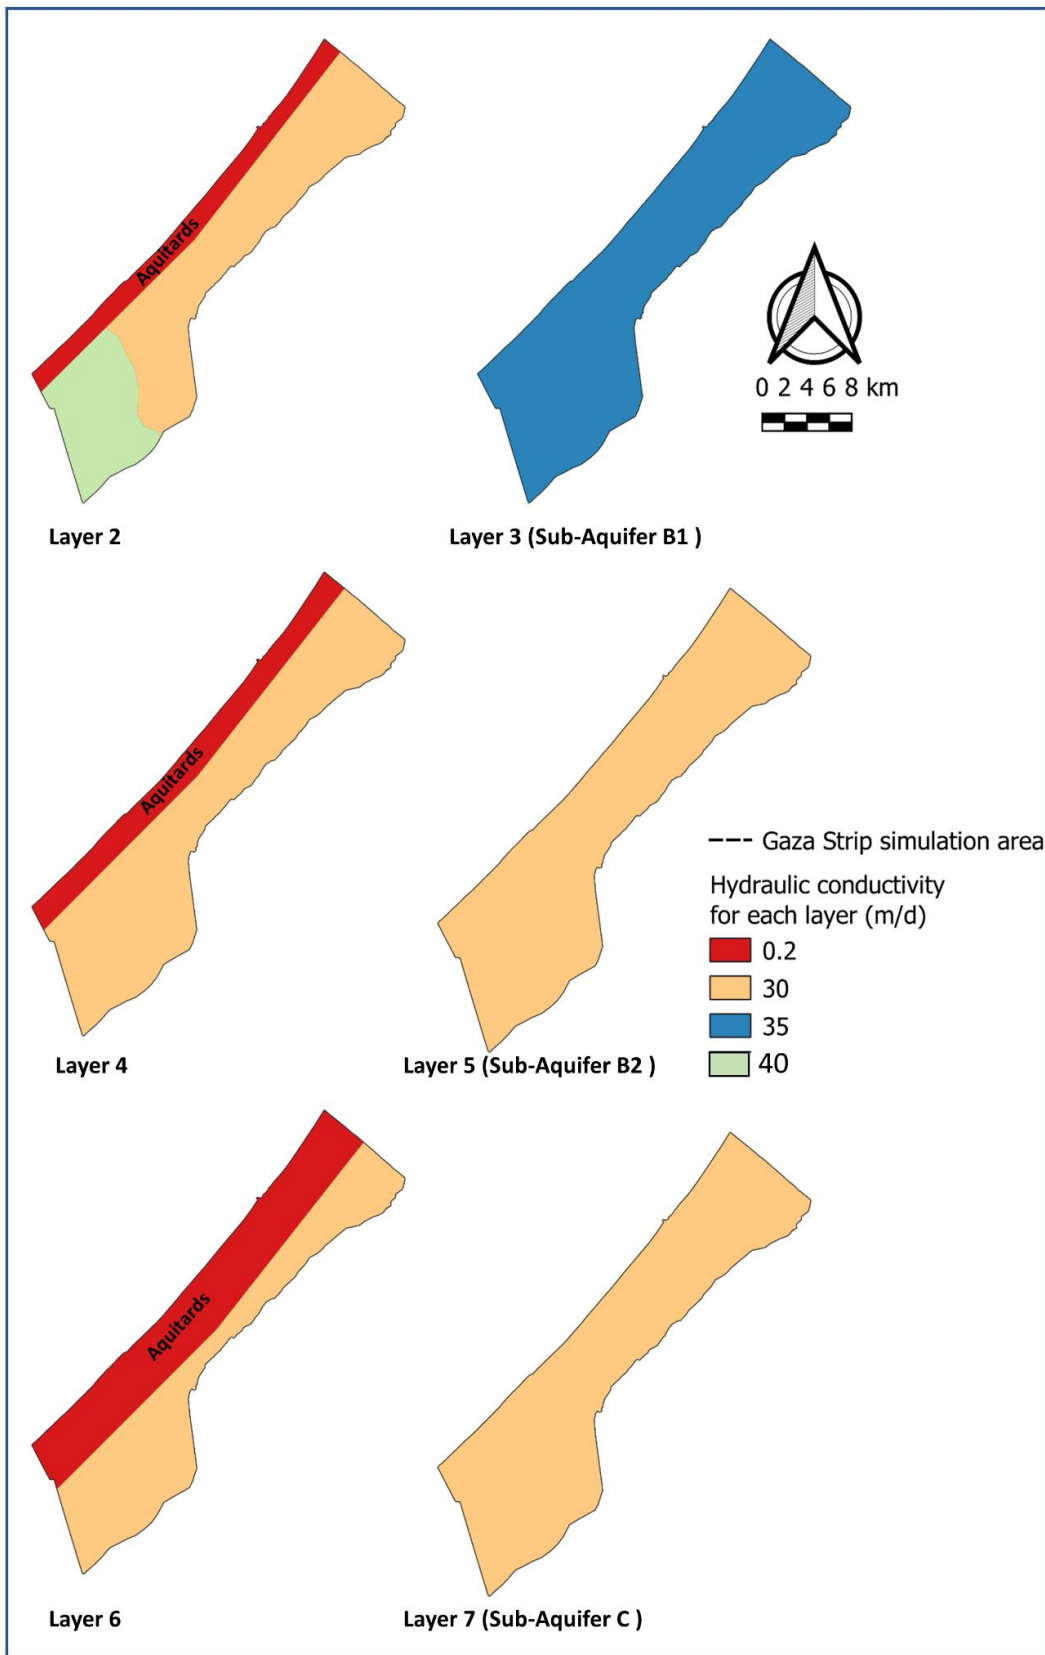

Fig S5 Calibrated horizontal hydraulic conductivity for the sub-aquifers and aquitards (layers 2-7)

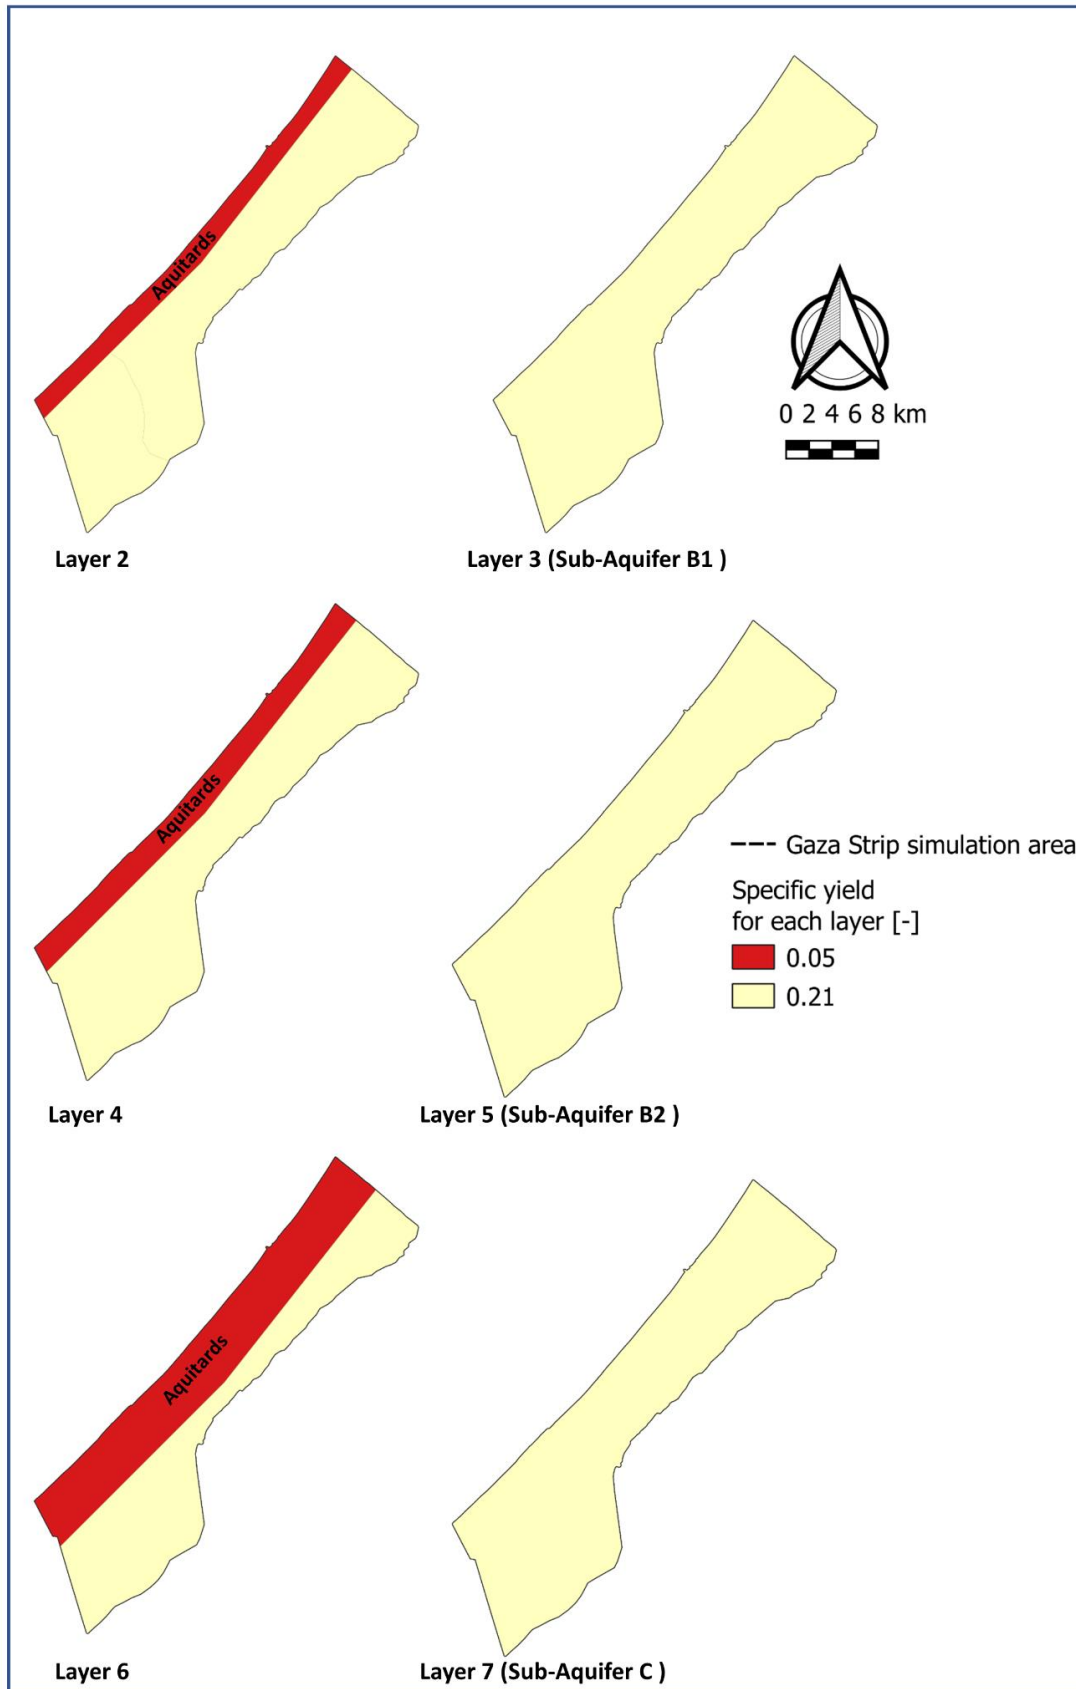

**Fig S6** Calibrated specific yield for the sub-aquifers and aquitards (layers 2-7)

**Table S1** Sub-Aquifers and aquitards. Calibrated parameters

| <b>Aquifer parameter</b>                             | <b>Calibrated parameters in this study</b> |                  |
|------------------------------------------------------|--------------------------------------------|------------------|
|                                                      | <b>85 observation wells</b>                |                  |
|                                                      | Sub-aquifers                               | Aquitards        |
| Porosity (all layers)                                | 0.25                                       | 0.3              |
| Specific storage, Ss (m <sup>-1</sup> ) (all layers) | 10 <sup>-4</sup>                           | 10 <sup>-5</sup> |

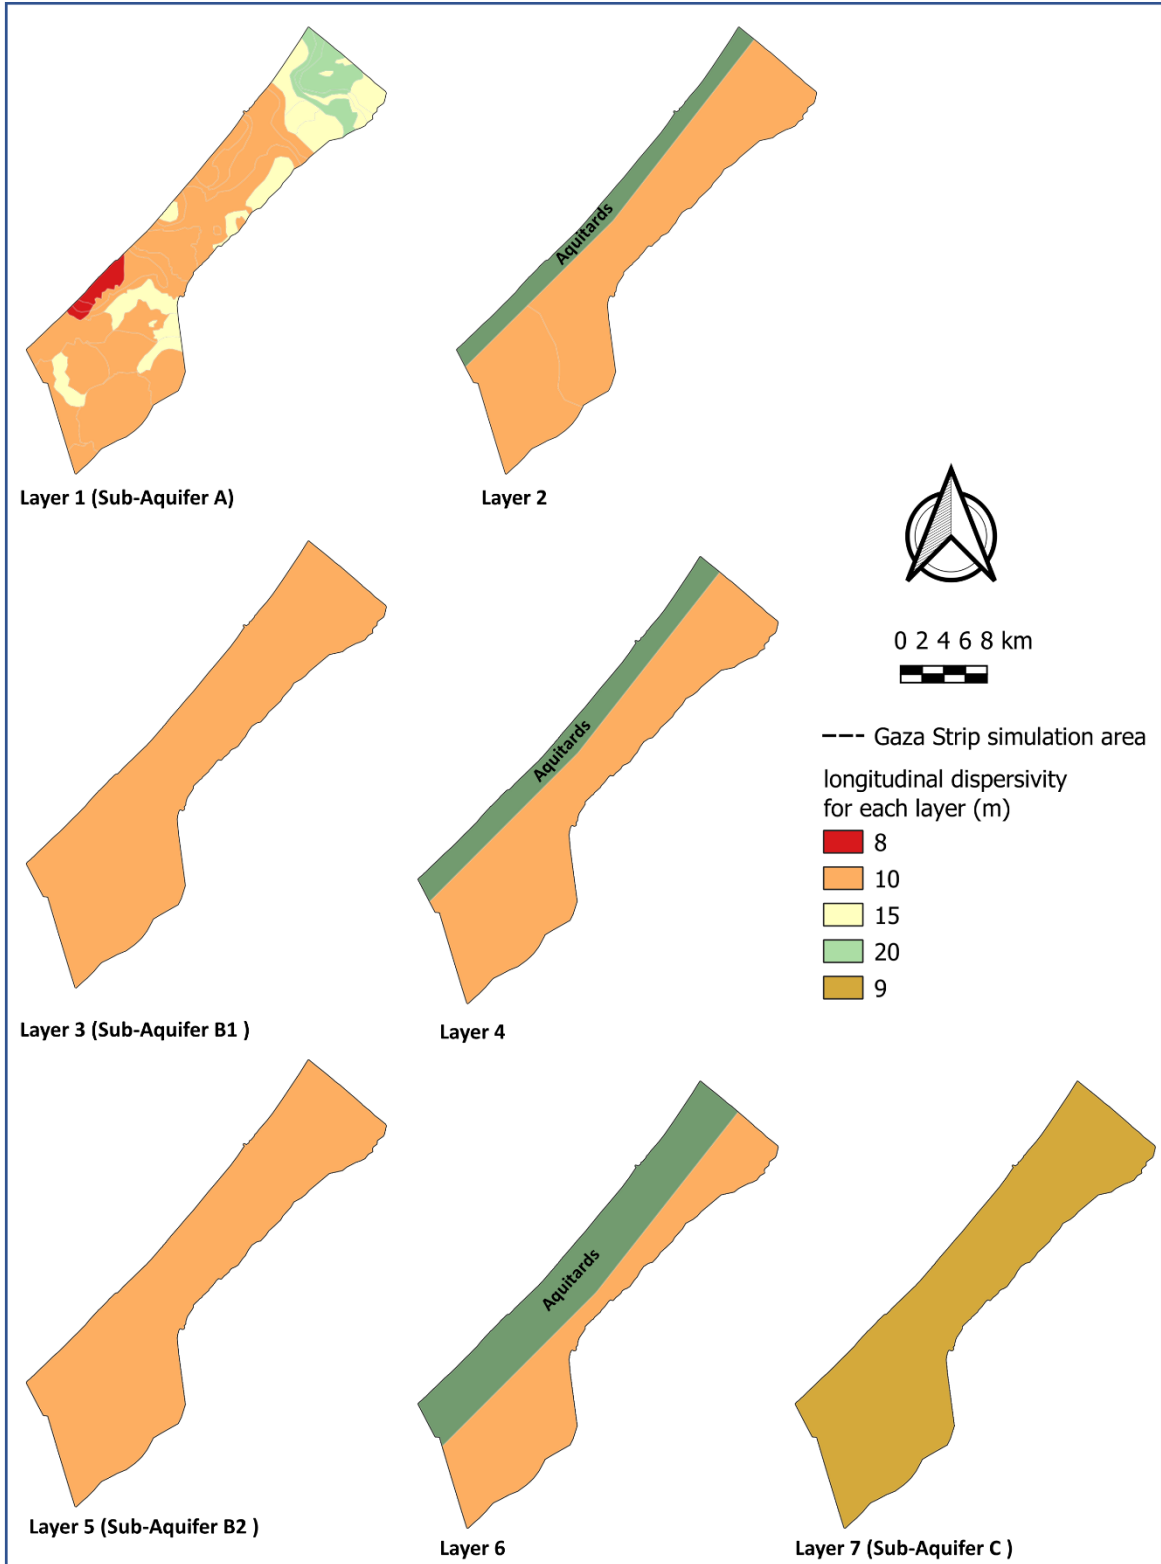

**Fig S7** The calibrated longitudinal dispersivity of the sub-aquifers



**Table S2** The calibrated longitudinal, horizontal, and vertical transverse dispersivity of the sub-aquifers and aquitards

| <b>Aquifer parameter</b>             | <b>Calibrated parameters in this study</b> |           |
|--------------------------------------|--------------------------------------------|-----------|
|                                      | <b>170 observation wells</b>               |           |
|                                      | Sub-aquifers                               | Aquitards |
| Longitudinal dispersivity (m)        | 8-20                                       | 6         |
| Horizontal dispersivity (m)          | 1-2                                        | 0.6       |
| Vertical transverse dispersivity (m) | 0.1-0.2                                    | 0.06      |

**Section S3** Estimated monthly rainfall recharge rates in representative areas

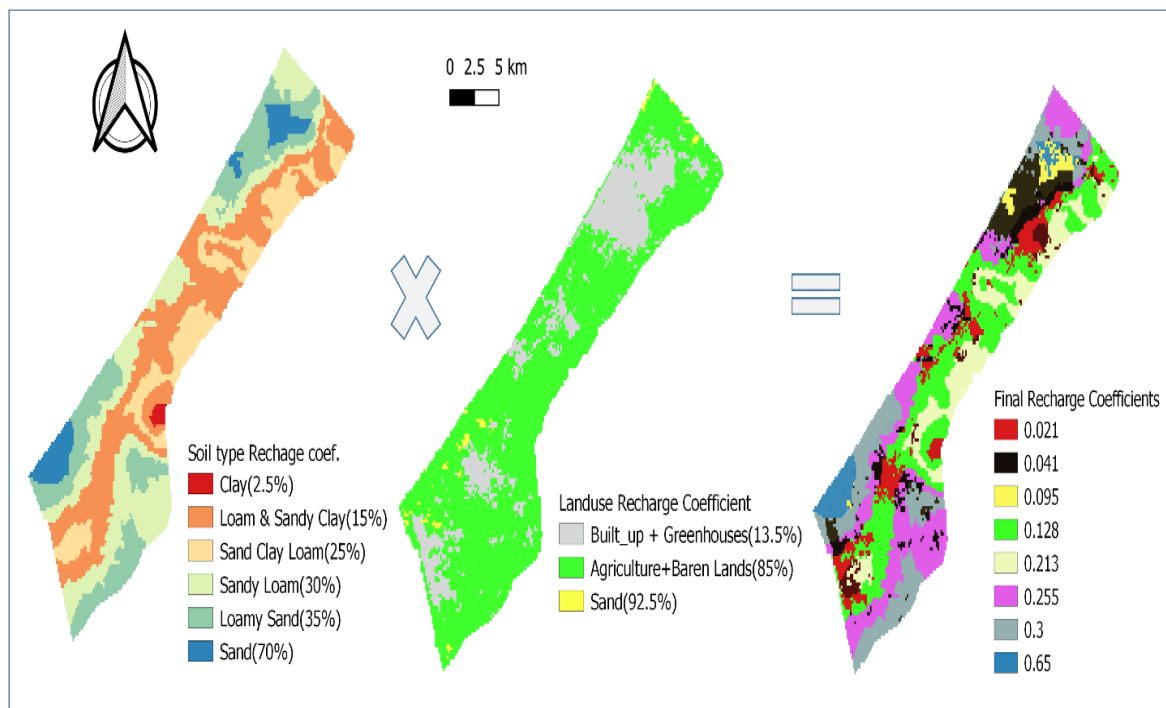

**Fig S8** The final aquifer recharge coefficients for period 2015-2019

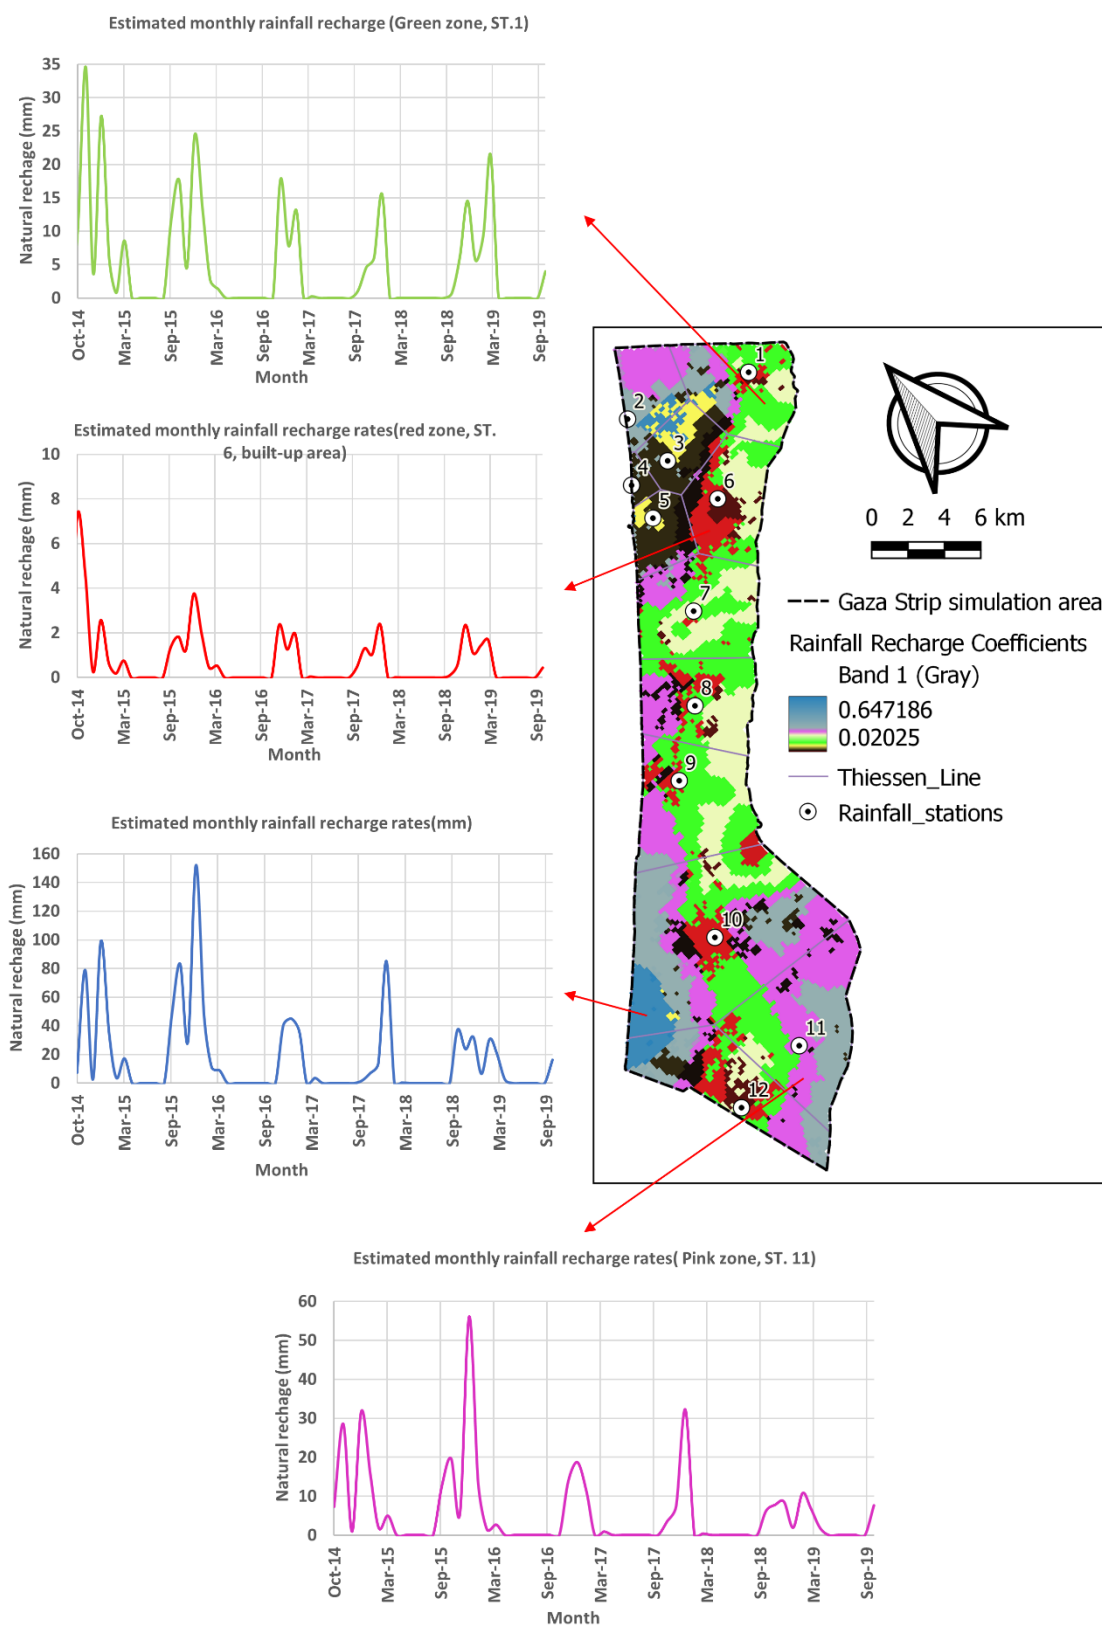

**Fig S9** Estimated monthly recharge rates for period 2015-201

**Section S4** Monthly leakage rates from water supply and wastewater pipelines for period 2010–2019 based on data from the Palestinian Water Authority (PWA, 2020)

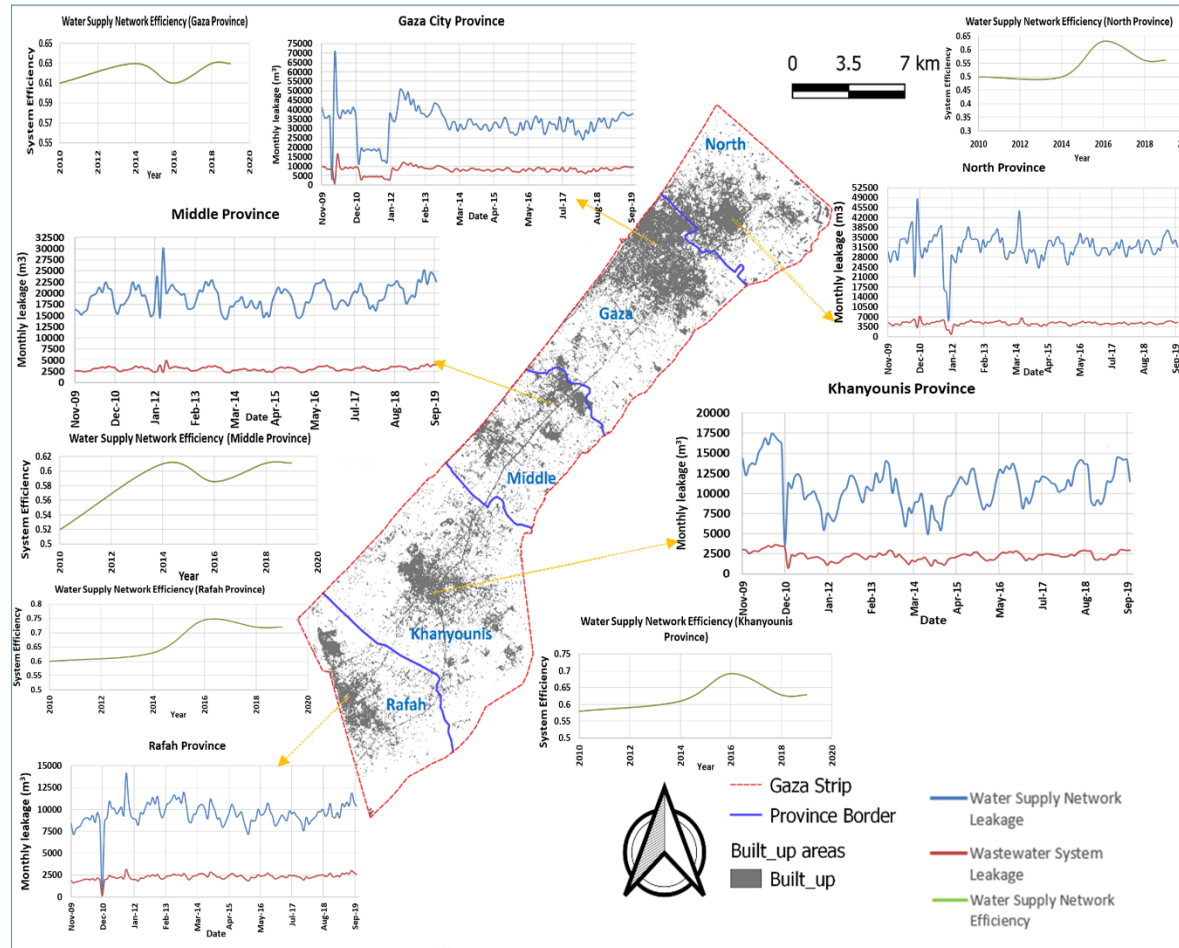

**Fig S10** Monthly leakage rates from water supply and wastewater pipelines in period 2010-2019 based on data from PWA (2020)

**Section S5** Monthly rates of return flow in every province for period 2010–2019 based on data from the Palestinian Water Authority (PWA, 2020)

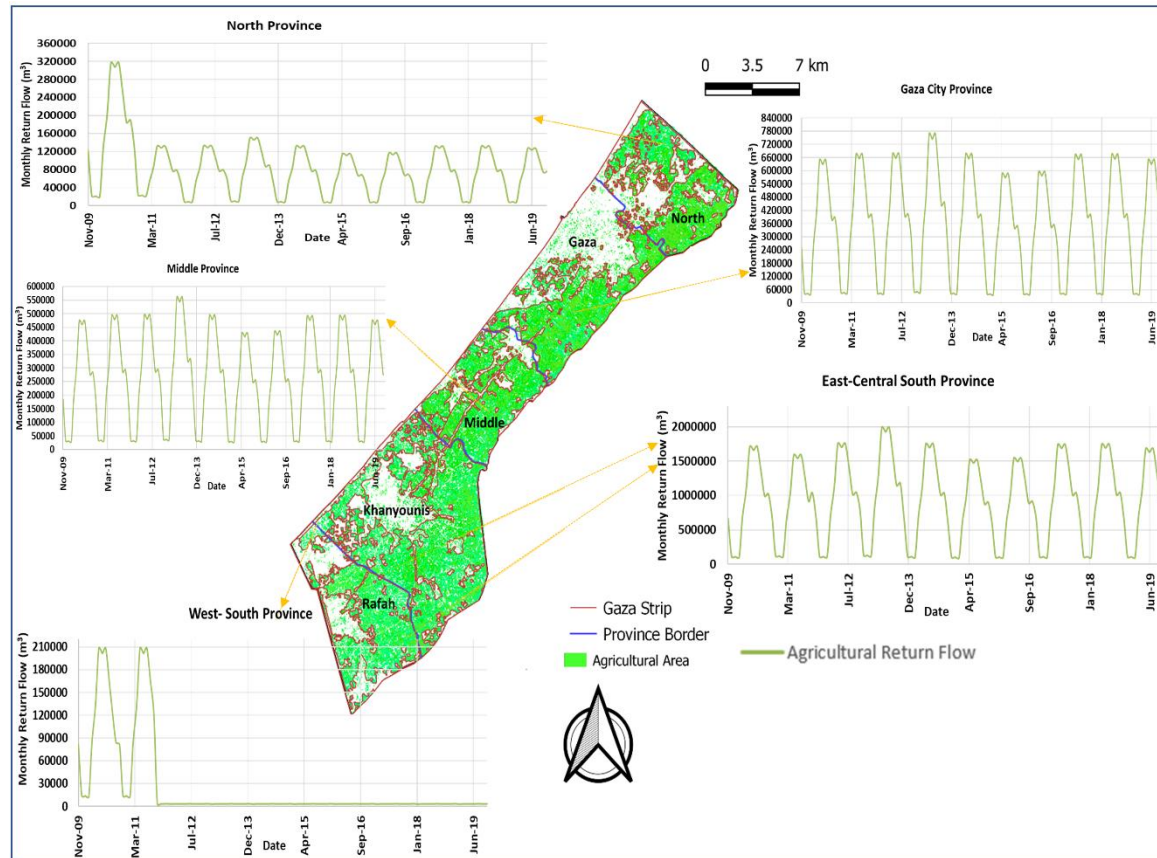

**Fig S11** Monthly rates of irrigation return flow in every province in 2010-2019 based on data from PWA (2020)

### **ESM Reference**

PWA (2020) Archived data, Gaza–Palestine, Palestinian Water Authority (Vol. 8, Issue 5),  
<http://www.pwa.gov.ps/>.
